# Supplementary material for: The effect of longitudinal trajectories of triglyceride-glucose index on the new-onset non-alcoholic fatty liver disease
Source: Research Square preprint supplement (doi:10.21203/rs.3.rs-5825018/v1), 2025-01-20
Supplement: Supplementary file 1 [file 518a3fd10bba1ea064fc0a7f.docx]

**Supplementary Table**

**Table S1 Group-based trajectory modeling (GBTM) fitting parameters**

- 1. **Parametric case of the fitted 2-trajectory subgroups**

| Order | | BIC | AvePP | | Proportion of Minimum group (%) |
| --- | --- | --- | --- | --- | --- |
| Group 1 | Group 2 | Group 1 | Group 2 |
| 1 | 1 | -76197.35 | 95.11 | 91.63 | 33.5 |
| 1 | 3 | -76192.87 | 95.11 | 91.62 | 33.6 |
| 1 | 2 | -76195.49 | 95.11 | 91.63 | 33.6 |
| 2 | 1 | -76165.11 | 95.13 | 91.61 | 33.6 |
| 2 | 3 | -76162.20 | 95.12 | 91.62 | 33.6 |
| 3 | 1 | -76148.08 | 95.15 | 91.60 | 33.5 |
| 3 | 3 | -76146.50 | 95.13 | 91.61 | 33.6 |

BIC: Bayesian Information Criterion；AvePP: Average Posterior Probability

- 1. **Parametric case of the fitted 3-trajectory subgroups**

| Order | | | BIC | AvePP | | | Proportion of Minimum subgroup (%) |
| --- | --- | --- | --- | --- | --- | --- | --- |
| Group 1 | Group 2 | Group 3 | Group 1 | Group 2 | Group 3 |
| 2 | 1 | 1 | -69796.94 | 90.93 | 89.65 | 91.05 | 10.6 |
| 2 | 2 | 1 | -69785.01 | 90.90 | 89.67 | 91.05 | 10.7 |
| 2 | 3 | 1 | -69765.23 | 90.88 | 89.67 | 91.10 | 10.7 |
| 3 | 1 | 1 | -69787.68 | 90.94 | 89.66 | 91.09 | 10.6 |
| 3 | 2 | 1 | -69775.61 | 90.93 | 89.66 | 91.09 | 10.6 |
| 3 | 3 | 1 | -69759.07 | 90.89 | 89.69 | 91.11 | 10.7 |

BIC: Bayesian Information Criterion；AvePP: Average Posterior Probability

**Table S2 Characteristics of subjects with new-onset NAFLD and without NAFLD**

| Variables | With new-onset NAFLD | Without NAFLD | t/χ²/Z | *P* value |
| --- | --- | --- | --- | --- |
| (n=3710) | (n=24825) |
| Male, n(%) | 1054(28.4) | 12402(50.0) | 600.540 | <0.001 |
| Age(mean±SD, years) | 67.33±4.907 | 67.80±5.140 | -5.255 | <0.001 |
| WC(mean±SD, cm) | 86.32±7.985 | 83.29±7.850 | 21.478 | <0.001 |
| BMI(mean±SD, kg/m2) | 25.64±2.824 | 24.00±2.942 | 31.816 | <0.001 |
| SBP(mean±SD, mmHg) | 141.75±18.132 | 139.99±18.086 | 5.520 | <0.001 |
| DBP(mean±SD, mmHg) | 81.75±9.906 | 82.38±10.340 | -3.448 | <0.001 |
| TC(mean±SD, mmol/L) | 5.01±1.048 | 4.92±0.984 | 5.410 | <0.001 |
| TG(IQR, mmol/L) | 1.35(1.00,1.90) | 1.10 (0.80,1.50) | 567.505 | <0.001 |
| HDL-C(mean±SD, mmol/L) | 1.49±0.442 | 1.61±0.461 | -14.571 | <0.001 |
| LDL-C(mean±SD, mmol/L) | 2.67±0.784 | 2.57±0.739 | 7.027 | <0.001 |
| FPG(IQR, mmol/L) | 5.60(5.10,6.20) | 5.50(5.10,6.10) | 7.396 | 0.007 |
| TyG(mean±SD) | 8.77±0.546 | 8.57±0.542 | 21.851 | <0.001 |
| Hypertensionn, n(%) | 2791(75.2) | 17463(70.3) | 37.150 | <0.001 |
| Diabetes, n(%) | 871(23.5) | 4747(19.1) | 38.444 | <0.001 |
| Dyslipidemia, n(%) | 1086(29.3) | 5830(23.5) | 58.567 | <0.001 |
| Medication History | 1966(53.0) | 10840(43.7) | 113.109 | <0.001 |

WC, waist circumference; BMI, body mass index; SBP, systolic blood pressure; DBP, diastolic blood pressure; TC, total cholesterol; TG, triglycerides; HDL-C, low-density lipoprotein cholesterol; LDL-C, low-density lipoprotein cholesterol; FPG, fasting plasma glucose; TyG, triglyceride-glucose.

Data are presented as means±SDs, median (IQR), and numbers (%).
